# Supplementary material for: Multifunctional Role of Chitosan Edible Coatings on Antioxidant Systems in Fruit Crops: A Review
Source: MDPI journal article supplement (doi:10.3390/ijms22052633), 2021-03-05
Supplement: s1 [file s1]

**Table S1.** Studies of the last five years related to the effect of chitosan (CS)-based coatings on antioxidant systems and enzymatic browning in several fruit crops during several storage conditions.

|    | <b>Fruits</b>                                                                                                                   | <b>CS-based coating</b>                                                       | <b>Coating method</b> | <b>Storage conditions</b>    | <b>Effect on antioxidant systems and enzymatic browning</b>                                                                                                                                 | <b>Reference</b> |
|----|---------------------------------------------------------------------------------------------------------------------------------|-------------------------------------------------------------------------------|-----------------------|------------------------------|---------------------------------------------------------------------------------------------------------------------------------------------------------------------------------------------|------------------|
| 1. | Kiwifruit cv. 'Hayward' (fresh-cut)                                                                                             | CS 1% (w/v) (formulated with acetic (AC; 1% v/v) or citric acid (C; 2 % w/v)) | Dip coating           | 4 °C and 75 % RH for 12 days | ↓ Ascorbic acid content (CS + AC)<br>→ Ascorbic acid content (CS + C)                                                                                                                       | [81]             |
| 2. | Mango cv. 'Kent' (whole)                                                                                                        | CS (1 and 1.5% w/v) with lactoperoxidase and iodine                           | Dip coating           | 18 °C and 60 % RH for 8 days | ↑ Ascorbic acid content                                                                                                                                                                     | [76]             |
| 3. | Strawberry cvs. 'Candonga', 'Ionica' and 'Sabrina' (whole)                                                                      | CS 1% and 2 (w/v)                                                             | Dip coating           | 2 °C and 95 % RH for 9 days  | ↑ Ascorbic acid content, total phenolics, total flavonoids, total anthocyanins, antioxidant activity<br>↑ CAT activity<br>↓ APX and LOX activity<br>↓ PPO and GPX activity<br>↓ MDA content | [45]             |
| 4. | Litchi cv. 'Purbi' (whole)                                                                                                      | CS (2% w/v) with salicylic acid (0.5 mM and 1.0 mM)                           | Dip coating           | 4 °C for 6 days              | ↑ Ascorbic acid, total phenolics, total flavonoids, anthocyanins, antioxidant activity                                                                                                      | [78]             |
| 5. | Mango cv. 'Tommy Atkins' (fresh-cut)                                                                                            | CS (0.2 % w/v) and Na-alginate (0.2 % w/v) (five nanolayers)                  | Dip coating           | 8 °C and 93 % RH for 14 days | → Ascorbic acid content<br>↓ Malondialdehyde content                                                                                                                                        | [50]             |
| 6. | Loquat Selection (CREAFRC-S18; CREAMFRC-S35 and CREAMFRC-S36) cvs (Golden Nugget, Algerie and Napolone rosso di Trabia) (whole) | CS 1 % (w/v)                                                                  | Dip coating           | 7 °C and 95 % RH for 21 days | ↑ Ascorbic acid content, total phenolics, total flavonoids, antioxidant activity<br>↓ Carotenoids content,                                                                                  | [71]             |

|     |                                                                  |                                                                                         |               |                                                                |                                                                                                                                                 |      |
|-----|------------------------------------------------------------------|-----------------------------------------------------------------------------------------|---------------|----------------------------------------------------------------|-------------------------------------------------------------------------------------------------------------------------------------------------|------|
| 7.  | Sweet cherry cvs. 'Ferrovia', 'Lapins' and 'Della Recca' (whole) | CS 0.5 % (w/v)                                                                          | Dip coating   | 2 °C and 95 % RH for 14 days plus 24 °C for 3 days             | ↑ SOD, APX, CAT activity<br>↓ PPO, LOX, POD activity<br>↓ MDA activity                                                                          | [57] |
| 8.  | Sweet cherry cvs. 'Ferrovia', 'Lapins' and 'Della Recca' (whole) | CS 0.5 % (w/v)                                                                          | Dip coating   | 2 °C and 95 % RH for 14 days plus 24 °C for 3 days             | ↑ Ascorbic acid, total phenolics, total flavonoids, anthocianins, antioxidant activity                                                          | [11] |
| 9.  | Mango cv 'Nam Dok Mai' (whole)                                   | CS (1 % w/v) with high, medium and low molecular weight                                 | Dip coating   | 25 °C for 16 days                                              | ↓ H <sub>2</sub> O <sub>2</sub> content<br>→ Ascorbic acid, total phenolics, total flavonoids, antioxidant activity<br>→ CAT and APX activities | [8]  |
| 10. | Red Kiwifruit (whole)                                            | CS (1 % w/v)                                                                            | Dip coating   | 20 °C for 26 days                                              | ↑ Ascorbic acid, total phenolics                                                                                                                | [69] |
| 11. | Apple cv. 'Anna' Strawberry cv. 'Festival' (whole)               | CS (2 % w/v) with olive leaf extracts (1-2 % w/v) and olive pomace extracts (1-2 % w/v) | Spray coating | 4 °C for 35 and 16 days for apple and strawberry, respectively | ↓ MDA content                                                                                                                                   | [46] |
| 12. | Strawberry cv. 'Festival' (whole)                                | CS (2 % w/v) with olive leaf extracts (1-2 % w/v) and olive pomace extracts (1-2 % w/v) | Spray coating | 4 °C for 16 days                                               | ↑ Ascorbic acid, total phenolics total flavonoids, anthocianins, antioxidant activity<br>↓ MDA content                                          | [47] |
| 13. | Cherimoya (whole)                                                | CS 1.0 % w/v with 20 mM citric acid                                                     | Dip coating   | 15 °C for 10 days                                              | ↑ Ascorbic acid content<br>↑ CAT, SOD, POD activity<br>↓ PPO activity, O <sub>2</sub> <sup>-</sup> and MDA content                              | [41] |
| 14. | Apple cv. 'Fuji' (fresh-cut)                                     | CS 0.2 % (w/v) with ascorbic acid 0.2 % (w/v)                                           | Dip coating   | Room temperature for 10 hours                                  | ↑ Ascorbic acid content                                                                                                                         | [79] |

|     |                                                               |                                                               |               |                                        |                                                                                                                                |       |
|-----|---------------------------------------------------------------|---------------------------------------------------------------|---------------|----------------------------------------|--------------------------------------------------------------------------------------------------------------------------------|-------|
|     |                                                               | or calcium chloride 0.2 % (w/v)                               |               |                                        |                                                                                                                                |       |
| 15. | Pomegranate cv 'Mallas Saveh' (whole)                         | CS 0.5 % (w/v), salicylic acid 2 mM, and salicyloyl CS 0.57 % | Dip coating   | 2 °C for 5 months plus 3 days at 20 °C | ↑ Total hydrophilic and lipophilic antioxidant activity, total phenols and total anthocyanins                                  | [94]  |
| 16. | Loquat cv 'Baiyu' (whole)                                     | CS 0.75 %, w/v nano-silica 30%, w/v                           | Dip coating   | 5 °C for 40 days                       | ↓ O <sub>2</sub> <sup>-</sup> , H <sub>2</sub> O <sub>2</sub> and MDA content<br>↓ PPO and LOX activity<br>↑ CAT, SOD activity | [37]  |
| 17. | Kiwifruit cvs. 'Anykista', 'Sentiabrskaya' and 'VIR2' (whole) | CS 1 % (w/v) with high, medium and low molecular weight       | Dip coating   | Room temperature for 14 days           | → Ascorbic acid, total phenols                                                                                                 | [91]  |
| 18. | Mango cv 'Nam Dok Mai' (whole)                                | CS 1 % (w/v) with 0.1 ppm spermidine                          | Dip coating   | 25 °C for 9 days                       | → H <sub>2</sub> O <sub>2</sub> content, total phenolics                                                                       | [112] |
| 19. | Plum (whole)                                                  | CS 2 % (w/v)                                                  | Dip coating   | 1 °C and 90 % RH for 35 days           | ↓ MDA content and anthocyanins<br>↑ Total phenols and ascorbic acid                                                            | [56]  |
| 20. | Guava cv. 'Pant Prabhat' (whole)                              | CS 0.5, 1 and 1.5 % (w/v)                                     | Dip coating   | 27-29°C and 70-75% RH for 12 days      | ↑ Total flavonoids<br>↑ Total phenols<br>↑ SOD activity<br>↓ Antioxidant activity                                              | [63]  |
| 21. | Longan cv. 'Diamond' (whole)                                  | CS 1.29 % (w/v) followed by UV irradiation                    | Dip coating   | 28 °C for 7 days                       | ↑ Total phenols<br>↓ PPO, POD activity                                                                                         | [96]  |
| 22. | Pomegranate cv. 'Herskawitz' and 'Wonderful' (arils)          | CS 0.25 %, 0.75 % and 1.5 % (w/v)                             | Dip coating   | 4 °C and 95 % RH for 14 days           | ↑ Ascorbic acid, antioxidant activity, total phenols and total anthocyanins                                                    | [64]  |
| 23. | Table grape cv. 'Yongyou 1' (whole)                           | CS 1 % (w/v) and CS-g-salicylic acid conjugate 1.03 % (w/v)   | Spray coating | 0 °C and 90-95% RH for 42 days         | ↑ Total phenols                                                                                                                | [93]  |

|     |                                    |                                                                                          |             |                                                                             |                                                                                                                                                                                           |       |
|-----|------------------------------------|------------------------------------------------------------------------------------------|-------------|-----------------------------------------------------------------------------|-------------------------------------------------------------------------------------------------------------------------------------------------------------------------------------------|-------|
| 24. | Pear cv. 'Huangguan' (whole)       | CS 5% (w/v)                                                                              | Dip coating | 25 °C for 21 days                                                           | ↑ PPO and POD activity<br>→ Ascorbic acid                                                                                                                                                 | [117] |
| 25. | Pineapple (fresh-cut fruit)        | CS and pullulan, CS and mucilage (obtained by linseed, nopal cactus and aloe)            | Dip coating | 4 °C for 18 days                                                            | ↑ Ascorbic acid content                                                                                                                                                                   | [86]  |
| 26. | Kumquat (whole)                    | CS 0.4% (w/v) with savory (1.25, 2.5 ppm) and tarragon oil (1.25, 2.5 ppm)               | Dip coating | 7 °C for 30 days                                                            | ↑ Ascorbic acid                                                                                                                                                                           | [80]  |
| 27. | Guava cv. 'Banati' (whole)         | CS 1% (w/v) with poly-vinyl-pyrrolidone 1 % (w/v) and salicylic acid (1 and 2 mM)        | Dip coating | 27 °C and 48% RH for 15 days                                                | ↑ Ascorbic acid, total phenolic, antioxidant capacity<br>↓ PPO and LOX activity                                                                                                           | [58]  |
| 28. | Pomegranate cv. 'Hicnazar' (whole) | CS 1% (w/v)                                                                              | Dip coating | 6 °C and 90 % RH for 6 months with or without modified atmosphere packaging | ↑ Ascorbic acid, total monomeric anthocyanin, total phenolic, antioxidant capacity (Ferric reducing antioxidant power)<br>→ Antioxidant capacity (Trolox equivalent antioxidant capacity) | [70]  |
| 29. | Litchi cv. 'Wuye' (whole)          | CS 2% (w/v)                                                                              | Dip coating | 25 °C and 85 % RH for 6 days                                                | ↑ Ascorbic acid, total anthocyanin, total phenolic, total flavonoids                                                                                                                      | [66]  |
| 30. | Guava cv. 'Allahabad' (whole)      | CS solution 1 % (w/v) with and without pomegranates peel extract 1%                      | Dip coating | 10 °C and 90-95 % RH for 20 days                                            | ↑ Ascorbic acid, total flavonoids, total phenolic, antioxidant capacity (DPPH and FRAP)                                                                                                   | [82]  |
| 31. | Guava cv. 'Paluma' (whole)         | CS 1, 2 and 3 % (w/v)                                                                    | Dip coating | 25 °C and 85 % RH for 96 hours                                              | ↓ Ascorbic acid<br>↑ POD activity                                                                                                                                                         | [73]  |
| 32. | Table grape cv. 'Kyoho' (whole)    | CS 1.5 % (w/v) with lauroyl arginate ethyl 0.075 % (w/v) and montmorillonite 0.1 % (w/v) | Dip coating | 4 °C and 95 % RH for 20 days                                                | ↑ Ascorbic acid<br>↓ PPO activity                                                                                                                                                         | [84]  |

|     |                                                                                                                                  |                                                                                    |             |                               |                                                                                                                                                        |       |
|-----|----------------------------------------------------------------------------------------------------------------------------------|------------------------------------------------------------------------------------|-------------|-------------------------------|--------------------------------------------------------------------------------------------------------------------------------------------------------|-------|
| 33. | Tangerine (whole)                                                                                                                | CS (C) 1.5 % (w/v) with montmorillonite (MMT) 0.5, 1 and 2 % (w/w)                 | Dip coating | 10 °C and 70 % RH for 11 days | ↑ Ascorbic acid (C+MMT-2 %)                                                                                                                            | [85]  |
| 34. | Loquat Selection (CREAFRC-S18; CREAMFRC-S35 and CREAMFRC-S36) cvs (Golden Nugget, Algerie and Nespalone rosso di Trabia) (whole) | CS 1 % (w/v)                                                                       | Dip coating | 7 °C and 95 % RH for 21 days  | ↑ CAT and APX activity<br>↓ SOD activity<br>↓ LOX, PPO and POD activity<br>↓ MDA content                                                               | [52]  |
| 35. | Grape cv ‘Sagrantino’ (whole)                                                                                                    | CS 1 and 2 % (w/v)                                                                 | Dip coating | 20 °C and 60 % RH             | ↑ Total phenolics<br>↑ SOD and APX activity<br>↓ LOX and PPO activity<br>↓ MDA content                                                                 | [53]  |
| 36. | Fig cv ‘Troiano’ (whole)                                                                                                         | CS 1 % (w/v) with ascorbic acid 1 % (w/v)                                          | Dip coating | 4 °C and 95 % RH for 9 days   | ↑ Ascorbic acid content, total phenolics, total flavonoids, antioxidant activity<br>↑ CAT and APX activity<br>↓ PPO and GPX activity                   | [75]  |
| 37. | Pomegranate cv. ‘Rabbab-e-Neyriz’ (whole)                                                                                        | CS 2 % (w/v) with and without malic (50 and 100 mM) and ossalic (5 and 10 mM) acid | Dip coating | 2 °C at 80 %–90 % RH 120 days | ↑ Total phenols, ascorbic acid and antioxidant activity<br>↓ H <sub>2</sub> O <sub>2</sub> and MDA content<br>↑ CAT activity<br>↓ PPO and POD activity | [42]  |
| 38. | Plum cv. ‘Sanhua’ (whole)                                                                                                        | CS (1.0 w/v) and hot air (37 °C for 6 hours)                                       | Dip coating | 5 °C for 40 days              | ↑ Total phenols and flavonoids (until to 24 days)<br>→ Antioxidant activity                                                                            | [100] |
| 39. | Nectarine (Whole)                                                                                                                | CS (1.0 w/v) with 30 and 120 kDa MW                                                | Dip coating | 28 °C at 80-90 % RH 8 days    | ↓ H <sub>2</sub> O <sub>2</sub> content (CS-120)<br>↓ MDA content<br>↑ APX, GR activity<br>↑ GSH, ASA content                                          | [55]  |

|     |                                              |                                                                                    |             |                                                                                                                            |                                                                                                                                |       |
|-----|----------------------------------------------|------------------------------------------------------------------------------------|-------------|----------------------------------------------------------------------------------------------------------------------------|--------------------------------------------------------------------------------------------------------------------------------|-------|
|     |                                              |                                                                                    |             |                                                                                                                            | <p>↑ Total phenol, flavonoids (CS-120)</p> <p>↑ Antioxidant activity</p>                                                       |       |
| 40. | Peach (whole)                                | CS (1.0 w/v) chlorogenic acid (1:1, 1:0.5, or 1:0.1 molar ratios) conjugate        | Dip coating | 20 ° C for 8 days                                                                                                          | <p>↑ Ascorbic acid</p> <p>↓ ROS content</p>                                                                                    | [43]  |
| 41. | Pineapple cv. 'Yellow Mauritius' (fresh-cut) | CS (1.0 w/v) grafted with procyanidin (1:0.8)                                      | Dip coating | 4°C for 14 days                                                                                                            | <p>↑ Ascorbic acid, total phenols, antioxidant activity</p> <p>↓ PPO and POD activity</p>                                      | [89]  |
| 42. | Apple cv. 'Amasya' (Fresh-cut)               | CS (0.25 w/v) with and without 2.5 (w/v) Stevia extract                            | Dip coating | 1 °C in Passive MAP (the beginning gas composition: 21% O <sub>2</sub> , 0.03% CO <sub>2</sub> and other gases) for 3 days | <p>↓ PPO activity</p> <p>↑ Total phenols, antioxidant activity</p>                                                             | [107] |
| 43. | Sweet cherry cv. 'Hongdend' (whole)          | CS (0.5 w/v) with 60 mM S-nitrosoglutathione (nanoparticles)                       | Dip coating | 0 °C for 25 days                                                                                                           | <p>↓ ROS content</p> <p>↑ SOD, POD, CAT, GR, DHAR, MDAR, APX activity</p> <p>↑ ASA, GSH content</p> <p>↓ DHA, GSSG content</p> | [39]  |
| 44. | Avocado cv 'Hass' (whole)                    | CS 1 and 1.5 w/v                                                                   | Dip coating | 7.5 °C for 28 days plus 5 or 7 days at 18 °C                                                                               | <p>↑ SOD, CAT activity</p> <p>↓ LOX activity</p> <p>↑ Epicatechin content</p>                                                  | [59]  |
| 45. | Apple cv. 'Granny Smith' (fresh-cut)         | CS 1 % w/v and ascorbic acid 1 and 5 % w/v<br>CS 2 % w/v and ascorbic acid 2 % w/v | Dip coating | 5 °C for 18 days                                                                                                           | <p>↑ Catechin, epicatechin and chlorogenic acid content CS 1 % + AA 5 %)</p>                                                   | [92]  |

|     |                                                   |                                                                                                       |             |                                 |                                                                                       |       |
|-----|---------------------------------------------------|-------------------------------------------------------------------------------------------------------|-------------|---------------------------------|---------------------------------------------------------------------------------------|-------|
| 46. | Fig (whole)                                       | CS 1 % (w/v) and Na-alginate 2 % (w/v) (layer-b-layer)                                                | Dip coating | 6 °C at 95 % RH for 15 days     | → Total phenolic, antioxidant activity                                                | [103] |
| 47. | Table grape cv. 'Alphonse Lavallée' (whole)       | CS 0.5, 1 and 2 % w/v                                                                                 | Dip coating | 1 °C at 90 % RH for 28 days     | ↓ Total phenols<br>↑ Antioxidant activity (CS-2 %)                                    | [98]  |
| 48. | Fig cv. 'Siah' (whole)                            | CS 0.5 % w/v with and without Thymol 200 ppm                                                          | Dip coating | 6 °C at 80 % RH for 20 days     | ↑ Anthocyanin content                                                                 | [115] |
| 49. | Mango                                             | CS 0.2 % (w/v) and Na-alginate 0.2 % (w/v) with cinnamon essential oil (three, five and seven layers) | Dip coating | 25 °C at 50 % RH for 14 days    | ↑ Ascorbic acid content                                                               | [19]  |
| 50. | Sweet cherry cv. 'Burlat' and 'Bigarreau' (whole) | Na-alginate 3 % w/v and CS 1 % w/v with and without olive leaves extract 1 % w/v                      | Dip coating | 25 °C at 65 % RH for 20 days    | ↑ Ascorbic acid content, total phenols, antioxidant activity<br>↓ Anthocyanin content | [106] |
| 51. | Papaya cv 'Lingnanzhong' (whole)                  | CS 0.5 w/v and pullulan 0.5 5 w/v (two, four and six layers)                                          | Dip coating | 25 °C at 50 % RH for 14 days    | ↑ Ascorbic acid content                                                               | [20]  |
| 52. | Sweet cherry cv. 'Taktaneh Mashhad' (whole)       | CS 1% (w/v) with UV-B and/or UV-C radiation                                                           | Dip coating | 5 °C with 90 % RH for 28 days.  | ↑ Ascorbic acid content, total phenolics, anthocyanins, antioxidant activity          | [97]  |
| 53. | Mango cv. 'Tommy Atkins' (whole)                  | CS 0.5 % (w/v) with peppermint (1.25 and 0.6 mL L <sup>-1</sup> )                                     | Dip coating | 12 °C with 85% RH for 30 days   | ↑ Total phenolics<br>↓ POD and PPO activity                                           | [102] |
| 54. | Blueberry (whole)                                 | CS 1% (w/v) plus silicon dioxide nanoparticles and nisin (1%)                                         | Dip coating | 28 °C with 75% RH for 8 days    | ↑ Ascorbic acid content, anthocyanins<br>↑ POD and PPO activity                       | [114] |
| 55. | Pistachio                                         | CS 2% (w/v) with and without salicylic acid (2 mmol L <sup>-1</sup> ),                                | Dip coating | 4 °C with 90–95% RH for 28 days | ↑ Total phenolics<br>↑ SOD, CAT and POD activity<br>↓ PPO activity                    | [95]  |

|     |                                        |                                                                                |                              |                                                     |                                                                                                                                                 |       |
|-----|----------------------------------------|--------------------------------------------------------------------------------|------------------------------|-----------------------------------------------------|-------------------------------------------------------------------------------------------------------------------------------------------------|-------|
| 56. | Majiyau pummelo (whole)                | CS 1.5% (w/v)                                                                  |                              | 20 °C for 150 days                                  | ↑ Ascorbic acid and glutathione coO2<br>↓ O <sub>2</sub> <sup>-</sup> , H <sub>2</sub> O <sub>2</sub> and MDA content<br>↑ SOD and APX activity | [40]  |
| 57. | Mango cv. 'White Chaunsa' (whole)      | CS 1 % (w/v) with and without aloe vera gel                                    | Dip coating                  | 12 °C with 80–85% for 28 days plus 25 °C for 5 days | ↑ Ascorbic acid content, total phenolics, antioxidant activity                                                                                  | [111] |
| 58. | Mango (whole)                          | CS 1 % (w/v) /Nano-TiO <sub>2</sub> (0.01 g and 0.03 g)                        | Dip coating                  | 13 °C                                               | ↑ Total phenolics, total flavonoids<br>↓ MDA content<br>↓ PPO and POD activity                                                                  | [51]  |
| 59. | Lemon cv. 'Eureka' (fresh-cut)         | CS 1.23 % (w/v) with clove oil 0.10 %                                          | Dip coating                  | 0 °C, 4 °C, 7 °C and 10 °C for 10 days              | ↑ Total phenolics, total flavonoids<br>↓ MDA content<br>↓ PPO and POD activity                                                                  | [54]  |
| 60. | Mandarin 'Kinnow' (whole)              | CS 0.05, 0.1, 0.15 % (w/v)                                                     | Dip coating                  | 5-7 °C at 90-95 % RH per 75 days                    | ↑ Ascorbic acid, total carotenoid                                                                                                               | [68]  |
| 61. | Lemon (whole)                          | CS 1.5 % (w/v) and CS 1.5 % (w/v) - carboxymethyl cellulose 1.5 % (w/v)        | Dip coating (layer-by-layer) | 0 °C for 20 days                                    | ↑ Ascorbic acid                                                                                                                                 | [24]  |
| 62. | Guava cv. 'Paluma' (whole)             | CS 0.5 % (w/v) with or without lemongrass essential oil 0.6 ppm                | Dip coating                  | 12 °C for 15 days                                   | ↑ Caftaric acid, Chlorogenic acid, Caffeic acid<br>↑ Narygenin, Quercetin 3-glucosyde, Trans-resveratrol<br>↑ POD activity<br>↓ PPO activity    | [77]  |
| 63. | Pomegranate cv. 'Malase Saveh' (arils) | CS 0.3 % (w/v) nanoparticles with and without clove essential oil 0.15 % (w/v) | Dip coating                  | 5 °C at 90 % RH for 60 days                         | ↑ Total phenols, anthocyanins, and antioxidant activity                                                                                         | [104] |

|     |                                   |                                                                                                             |                                |                                                                 |                                                                                                                                                                                                                   |       |
|-----|-----------------------------------|-------------------------------------------------------------------------------------------------------------|--------------------------------|-----------------------------------------------------------------|-------------------------------------------------------------------------------------------------------------------------------------------------------------------------------------------------------------------|-------|
| 64. | Strawbeery (whole)                | CS 1.2 % (w/w) with different molecular weight (5, 19 and 61 kDa)                                           | Electrostatic spraying coating | 4 °C at 85 % RH for 15 days                                     | ↑ Total flavonoids<br>↓ MDA content<br>↑ SOD activity                                                                                                                                                             | [48]  |
| 65. | Sweet orange cv. 'Baladi' (whole) | CS 0.25, 0.5 and 1 % (v/v)                                                                                  | Dip coating                    | 4° C at 85-90 % RH for 8 weeks                                  | ↑ Ascorbic acid                                                                                                                                                                                                   | [72]  |
| 66. | Litchi cv. 'Deshi' (whole)        | CS 2 % and pullulan 2 % (50:50) with pomegranate peel extract                                               | Dip coating                    | 23 °C at 40-45% RH for 18 days<br>4 °C at 90-95% RH for 18 days | ↑ Total phenolic, total flavonoids, antioxidant activity                                                                                                                                                          | [105] |
| 67. | Longan cv. 'Fuyan' (whole)        | CS 0.4, 0.2, 0.13, 0.1 % (v/v)                                                                              | Dip coating                    | 25 °C at 85% RH for 6 days.                                     | ↑ Carotenoids and total phenols<br>↑ Anthocyanins (0.2 and 0.13 %)<br>↑ Total flavonoids and ascorbic acid (0.2 %)                                                                                                | [67]  |
| 68. | Strawberry cv. 'Camarosa' (whole) | CS 1 % (w/v), CS with CS nanoparticles (CSNPs) (33 %), CS with CS nanoparticles with propolis (P) (10-30 %) | Dip coating                    | 4 °C for 8 days                                                 | ↑ Total phenols and antioxidant activity<br>↑ Total flavonoids (CS + CSNPs + P 20%)                                                                                                                               | [109] |
| 69. | Strawberry (whole)                | CS (1 %) with and without whey protein (1%)                                                                 | Dip coating                    | 5 °C and 20 °C, at 75 % RH for 8 days                           | ↑ Total phenols, ascorbic acid and antioxidant activity                                                                                                                                                           | [110] |
| 70. | Strawberry (whole)                | CS nanoparticles (NCTS) (0.2 %) with CaCl <sub>2</sub> (0-4 %)                                              | Dip coating                    | 4 °C for 15 days                                                | ↑ Ascorbic acid, total phenols, anthocyanins, antioxidant activity (NCTS+ CaCl <sub>2</sub> 3 % and (NCTS+ CaCl <sub>2</sub> 4 %)<br>↓ MDA content (NCTS+ CaCl <sub>2</sub> 3 % and (NCTS+ CaCl <sub>2</sub> 4 %) | [49]  |
| 71. | Black mulberry (whole)            | CS 1 % (w/v) with cassava starch 1 % (w/v)                                                                  | Dip coating                    | 5 °C for 16 days                                                | ↑ Total phenols, anthocyanins<br>→ Antioxidant activity                                                                                                                                                           | [108] |
| 72. | Strawberry cv. 'Hongyan' (whole)  | CS 1 % (v/v) with apple peel polyphenols 0.25, 0.5, 0.75 and 1 % (w/v)                                      | Dip coating                    | 20 °C at 35-40% RH for 6 days                                   | ↑ Total phenols, total flavonoids, anthocyanins, ascorbic acid, antioxidant activity                                                                                                                              | [83]  |

|     |                                      |                                                                                                                                                                                              |             |                                                      |                                                                                                                                                                                                                                                                                                                                                   |       |
|-----|--------------------------------------|----------------------------------------------------------------------------------------------------------------------------------------------------------------------------------------------|-------------|------------------------------------------------------|---------------------------------------------------------------------------------------------------------------------------------------------------------------------------------------------------------------------------------------------------------------------------------------------------------------------------------------------------|-------|
| 73. | Sweet cherry cv. 0900-Ziraat (whole) | CS (CH-1) and (CH-2) extracted by shrimp waste, commercial CS (CS-1, deacetylation degree: 81.22%, molecular weight: 273 kDa; CS-2, deacetylation degree: 75.12%, molecular weight: 407 kDa) | Dip coating | 4 °C and for 25 days<br>20 °C for 15 days            | ↑ Ascorbic acid and antioxidant activity (C1; 4 °C)<br>↑ Anthocyanins, total phenols (CS-2; 4 °C)<br>↑ Total phenols (CS-1; 20 °C)<br>↑ Anthocyanins (CS-2; 20 °C)<br>↑ Ascorbic acid (CS-2; 4 °C)                                                                                                                                                | [90]  |
| 74. | Apple cv-Fuji (fresh-cut)            | CS 0.5 % (w/v) and S-nitrosoglutathione-CS nanoparticles (1 mM)                                                                                                                              | Dip coating | 4 °C for 4 days                                      | ↑ Ascorbic acid, total phenols<br>↓ •O <sub>2</sub> <sup>-</sup> content and PPO activity<br>↓ H <sub>2</sub> O <sub>2</sub> content and DHA<br>↑ CAT, SOD, APX, POD, DHAR, MDHAR activity                                                                                                                                                        | [32]  |
| 75. | Pomegranate cv. 'Jahrom' (arils)     | CS (CS) (0.5 and 1% w/v), ascorbic acid (1 and 2% w/v), and citric acid (1 and 2% w/v)                                                                                                       | Dip coating | 5–7 °C at 95% RH for 15 days                         | → Ascorbic acid, total phenol, anthocyanins (CS)<br>↓ Antioxidant activity<br>↓ POD activity (CS-1 %)<br>↓ PPO activity (CS-0.5 and 1 %)<br>↑ CAT activity (CS-0.5 and 1 %)                                                                                                                                                                       | [74]  |
| 76. | Guava cv. 'Paluma' (whole)           | CS (CS) (0.5 and 1% w/v) with and without neem oil (NO) (0.5-1 % v/v)                                                                                                                        | Dip coating | 24 °C for 10 days plus 20 days at 10 °C with 85 % RH | → Ascorbic acid (CS 1 %, CS 1% + NO 0.5 %, CS 1 % + NO 1 %) at 24 °C<br>→ Total Phenols (CS 0.5 %, CS 1 %, CS 0.5 % + NO 1 %) at 24 °C<br>↑ Antioxidant activity (CS 1 % + NO 1 %) at 24 °C<br>↑ POD activity (CS 0.5 %, CS 1 %, CS 0.5% + NO 1 %)<br>→ Ascorbic acid (at 10 °C)<br>→ Total Phenols (CS 1 % + NO 1 %; CS 1 % + NO 0.5 %) at 10 °C | [101] |

|                                                                                                                                            |                                               |                                                                                   |             |                             |                                                                                                                           |      |
|--------------------------------------------------------------------------------------------------------------------------------------------|-----------------------------------------------|-----------------------------------------------------------------------------------|-------------|-----------------------------|---------------------------------------------------------------------------------------------------------------------------|------|
|                                                                                                                                            |                                               |                                                                                   |             |                             | <p>↑ Antioxidant activity (CS 1%, CS 0.5 % CS 0.5% + NO 1 %, CS 0.5% NO 0.5 %) at 10 °C<br/>→ POD activity (at 10 °C)</p> |      |
| 77.                                                                                                                                        | Pomegranate cv. 'Rabab' (arils)               | <i>Satureja hortensis</i> essential oil-loaded CS (0.5 w/v) nanoparticles (1:0.5) | Dip coating | 5 °C at 90 % RH for 18 days | <p>↑ Ascorbic acid, total phenols, anthocyanins, antioxidant activity</p>                                                 | [87] |
| 78.                                                                                                                                        | Table grape cv. 'Michele Palieri' (whole)     | CS (1 w/v) plus UV-C                                                              | Dip coating | 1°C at 90% RH for 21 days   | <p>↓ Total phenols<br/>↑ Antioxidant activity</p>                                                                         | [99] |
| 79.                                                                                                                                        | Grape cvs. 'Kyoho' and 'Shine Muscat' (whole) | CS (1.5 w/v)                                                                      | Dip coating | 22 °C at 95% RH for 12 days | <p>↑ SOD, CAT, APX, POD activity<br/>↓ MDA content</p>                                                                    | [38] |
| At the end of storage has been evaluate decrease (↓), increase (↑) or no significant effect (→) on each feature in CS-based coated fruits. |                                               |                                                                                   |             |                             |                                                                                                                           |      |
